# Supplementary material
Source: PubMed Central journal article supplement (PMC3416621)
Supplement: AEM.01525-12_zam999103606so1.pdf [file AEM.01525-12_zam999103606so1.pdf]

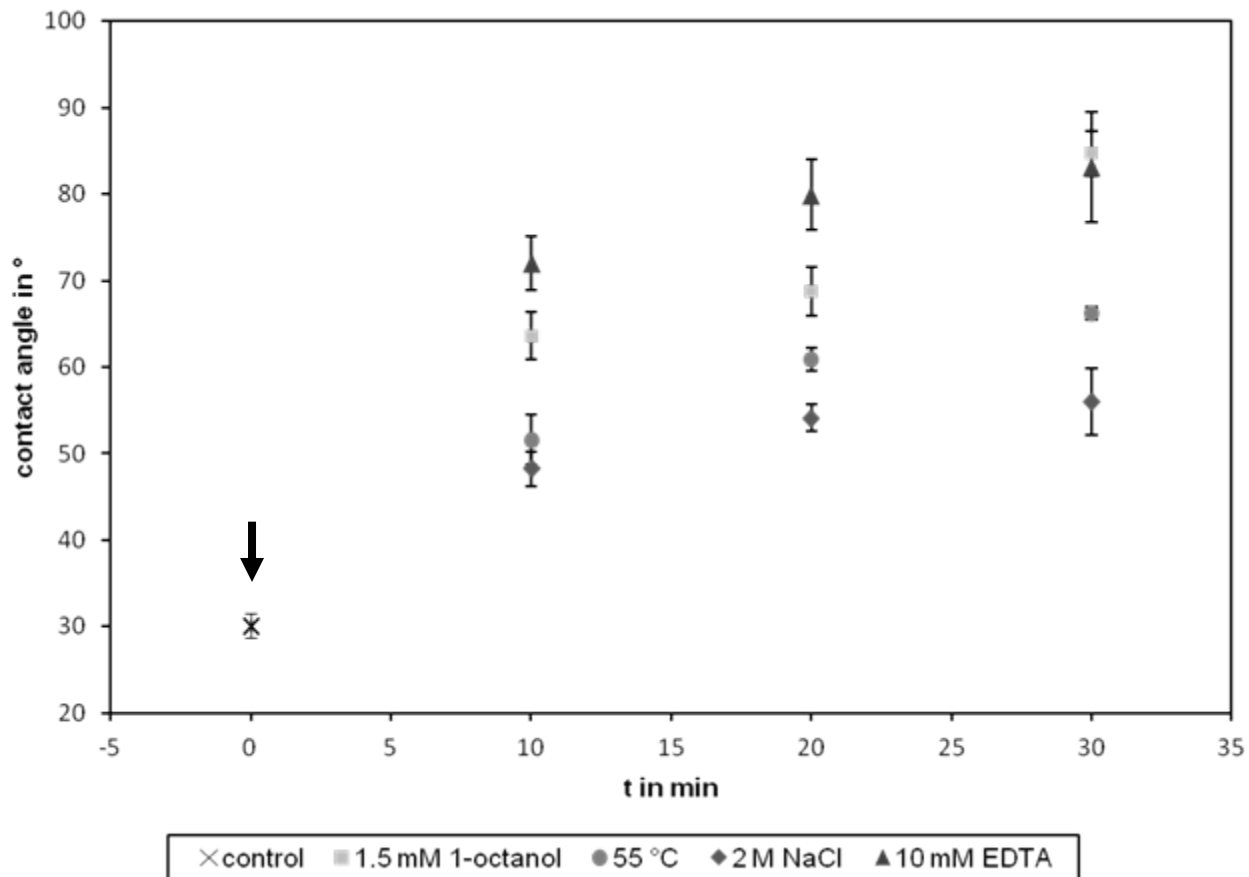

Fig. S1. Effect of the addition (indicated by the arrow) of the stress factors applied in this study on the contact angle of *P. putida* DOT-T1E.
